# Supplementary figures and images for: Potential for primary productivity in a globally-distributed bacterial phototroph
Source: PubMed Central journal article supplement — ISME J. 2018 Mar 9;12(7):1861–6. doi: 10.1038/s41396-018-0091-3 (PMC6018677; doi:10.1038/s41396-018-0091-3), 2018-03-09

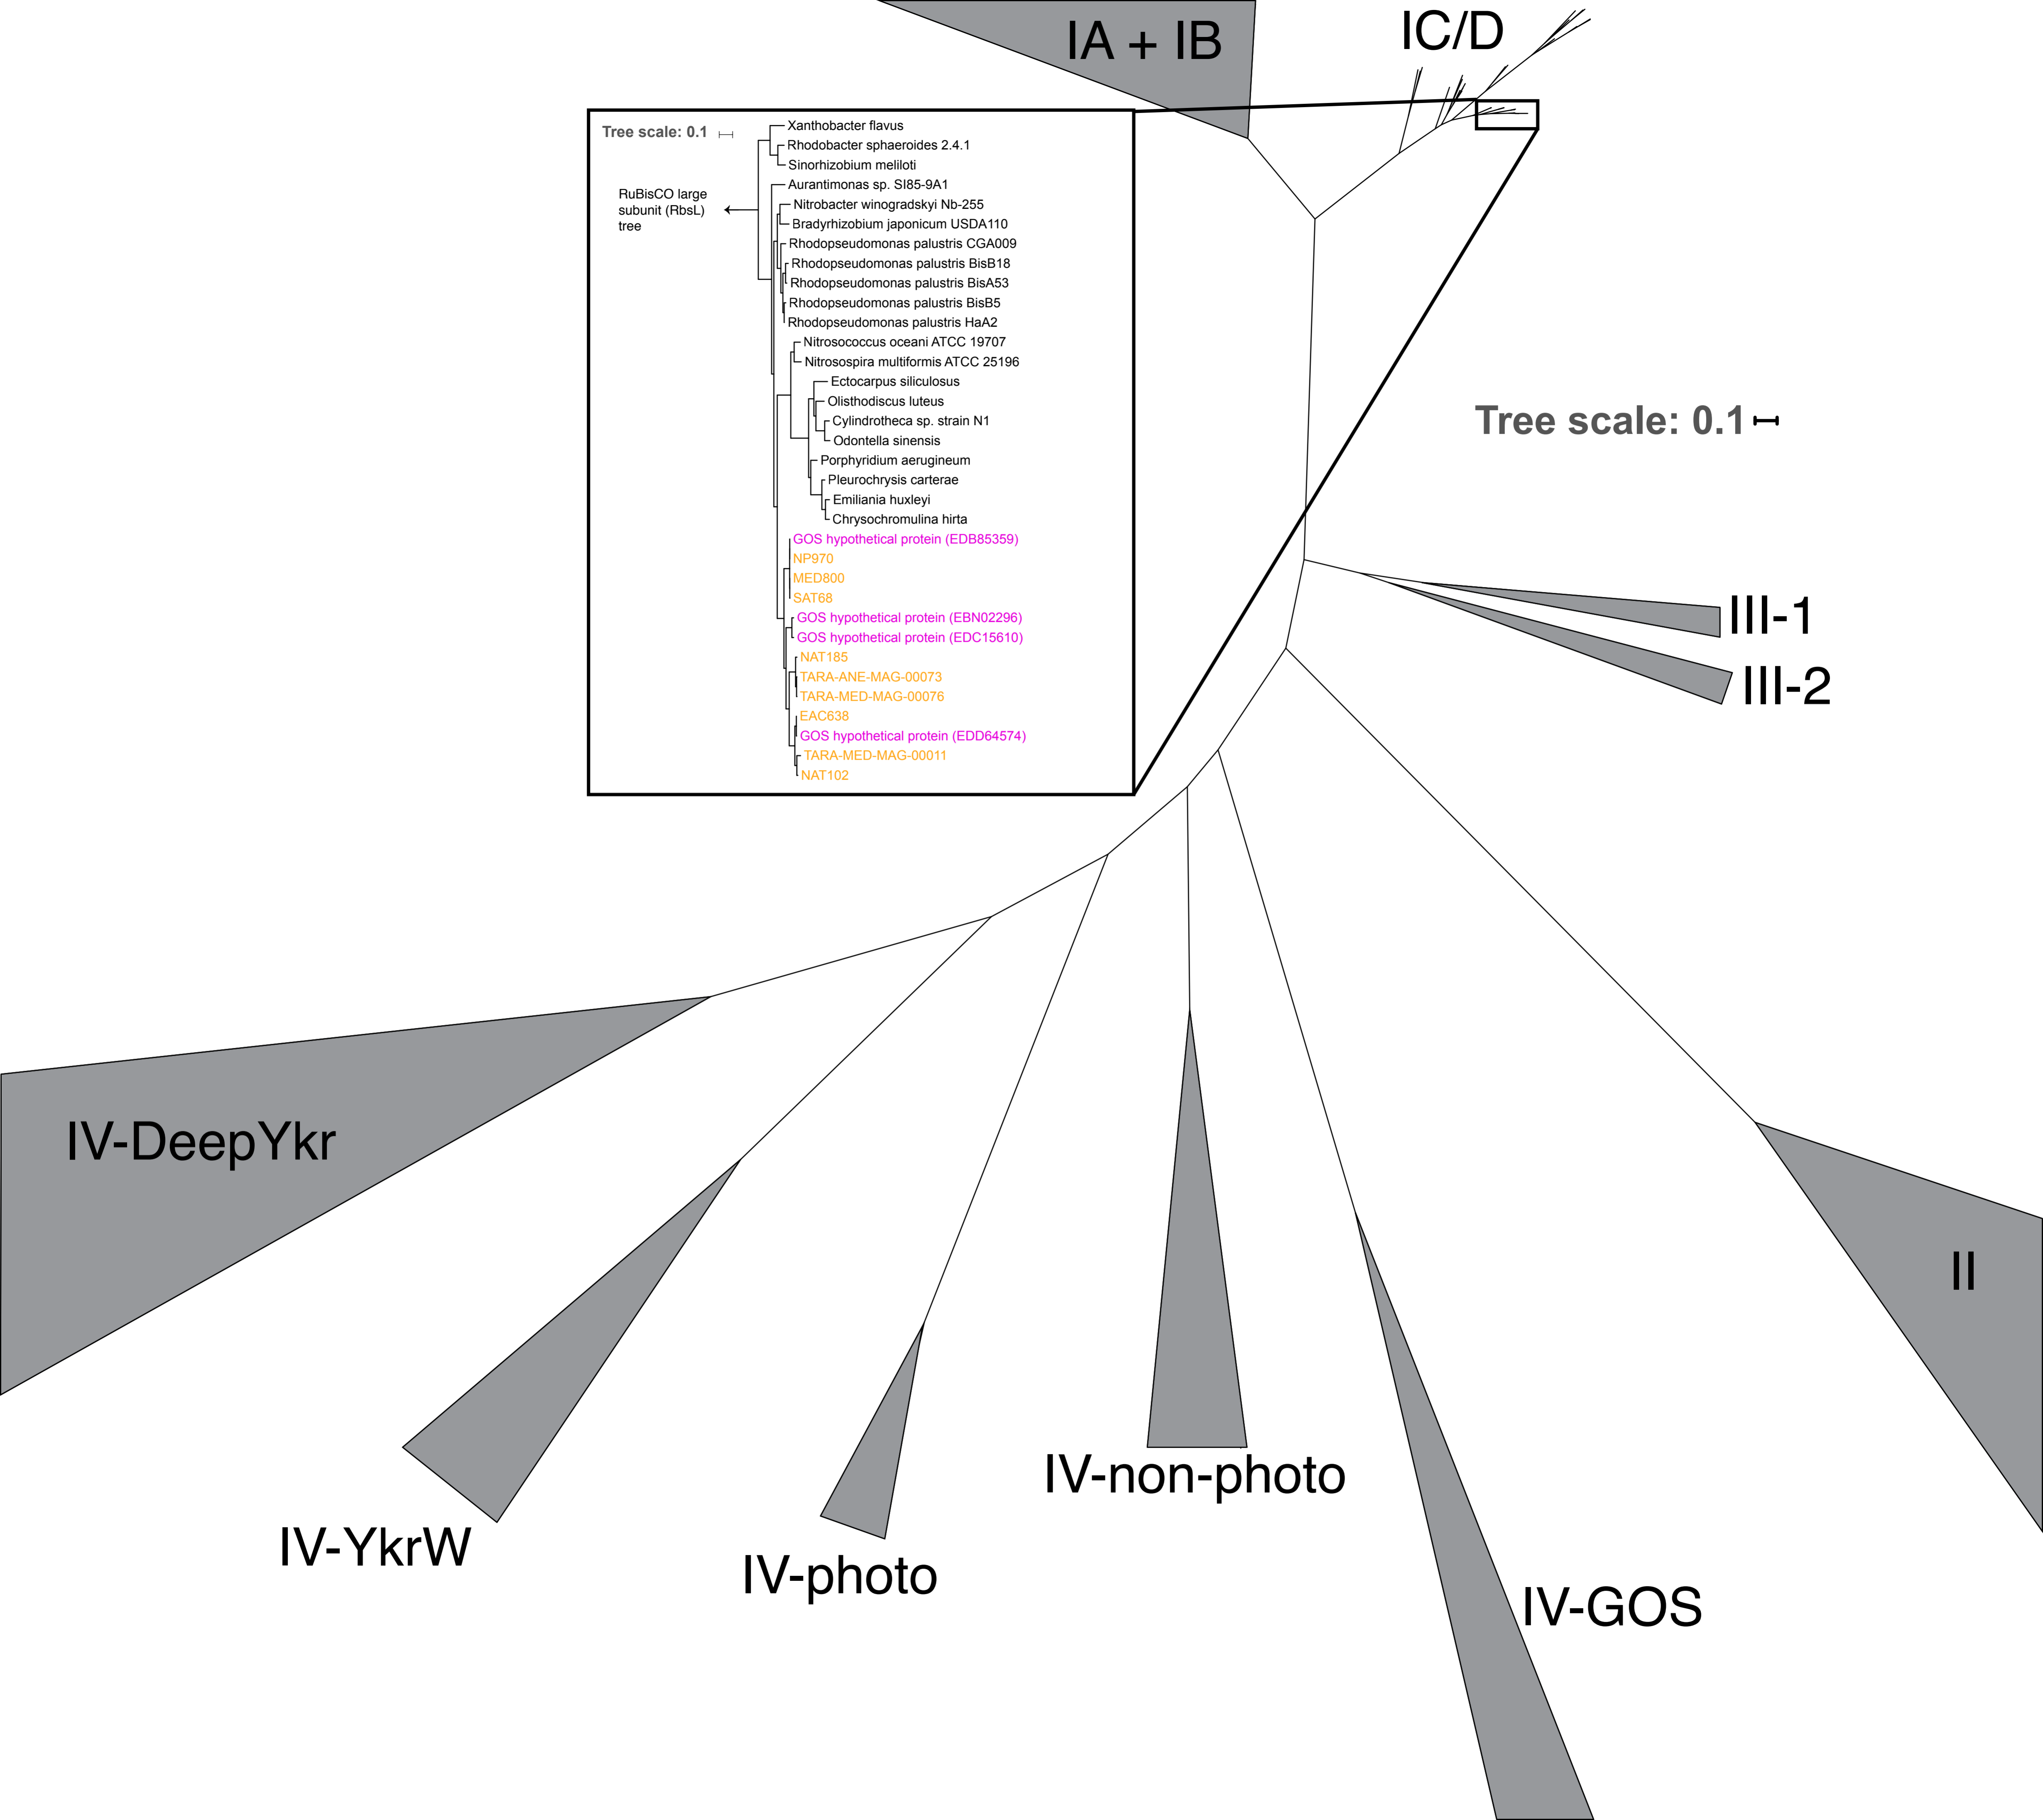

Supplement: 41396_2018_91_MOESM2_ESM.pdf [file 41396_2018_91_MOESM2_ESM.pdf]
